# Supplementary material for: Fabrication of freestanding honeycomb films with through-pore structures via air/water interfacial self-assembly
Source: Royal Society of Chemistry journal article supplement (doi:10.1039/c0cc02680h), 2010-09-20
Supplement: c0cc02680h.pdf [file c0cc02680h.pdf]

## Supplementary Information

# Fabrication of Freestanding Honeycomb Films with Through-Pore Structures via Air/Water Interfacial Self-Assembly

Hongmin Ma, Jiwei Cui, Aixin Song, and Jingcheng Hao\*

Key Laboratory of Colloid and Interface Chemistry of Ministry of Education, Shandong University,  
Jinan 250100, China

\*Corresponding author. E-mail: jhao@sdu.edu.cn; Fax: +86-531-88564750

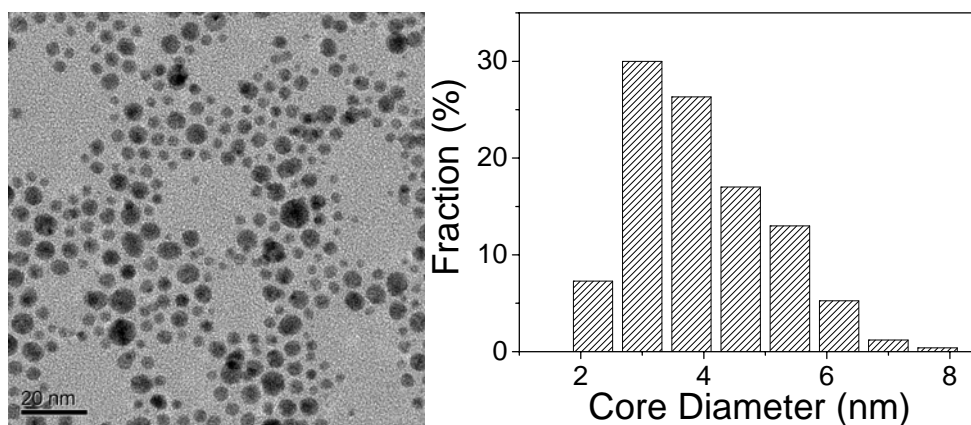

**Fig. S1** TEM image of dodecanethiol-stabilized gold nanoparticles (left) and the corresponding size distribution histogram (right).

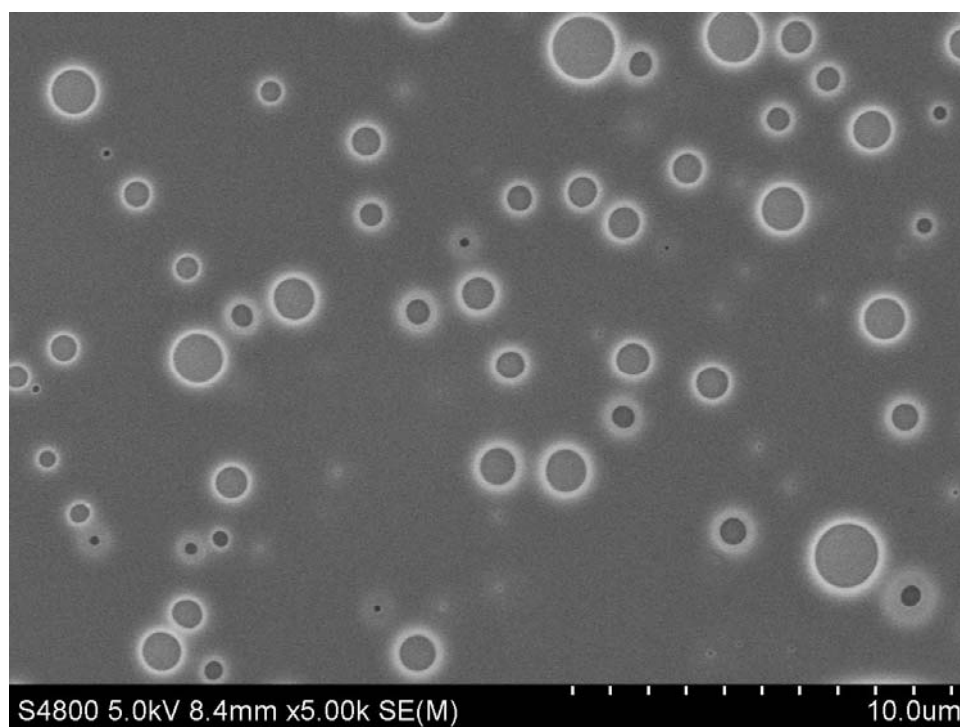

**Fig. S2** SEM image of polystyrene (PS) porous film prepared using breath figure method. The casting solution contained 2.5 g/L of PS.

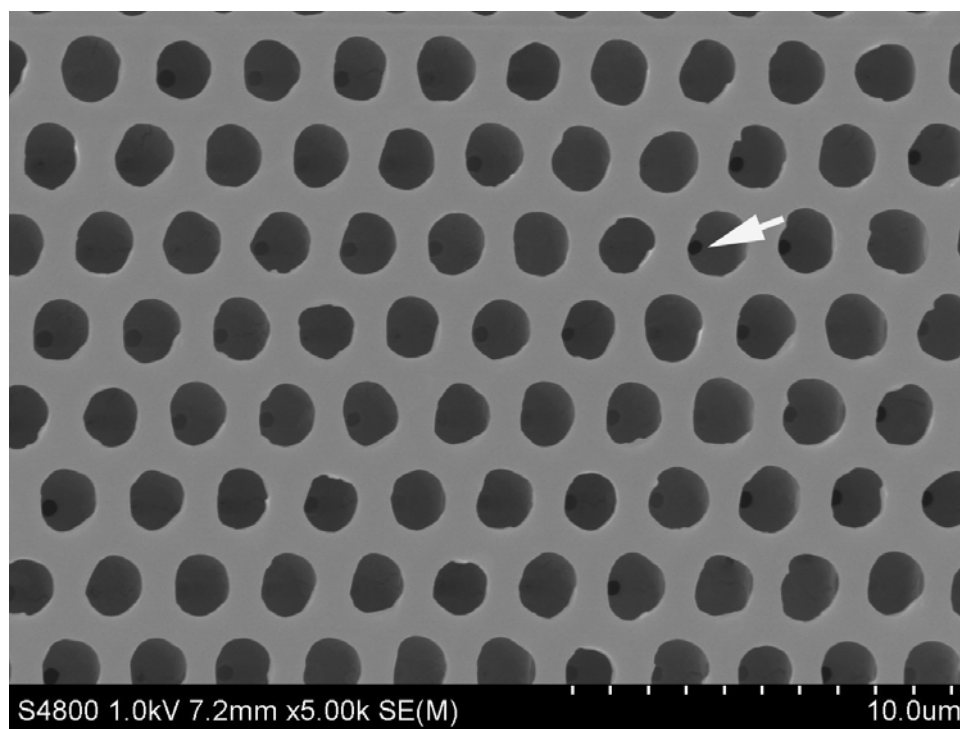

**Fig. S3** SEM image of top side of the freestanding honeycomb film prepared at air/water interface.

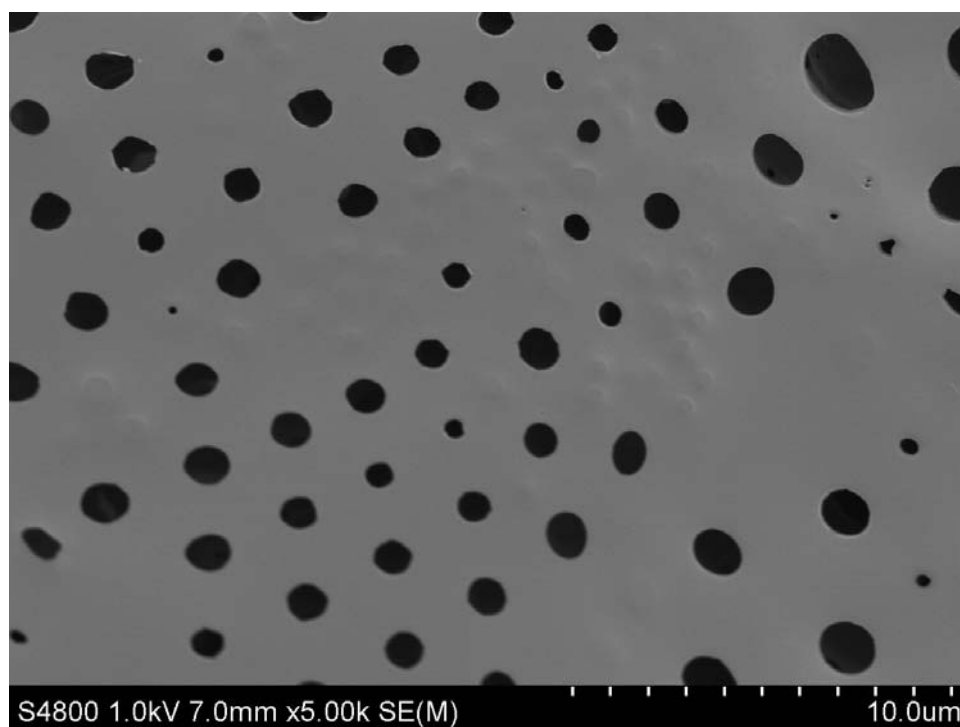

**Fig. S4** SEM image of bottom side of the freestanding honeycomb film prepared at air/water interface.

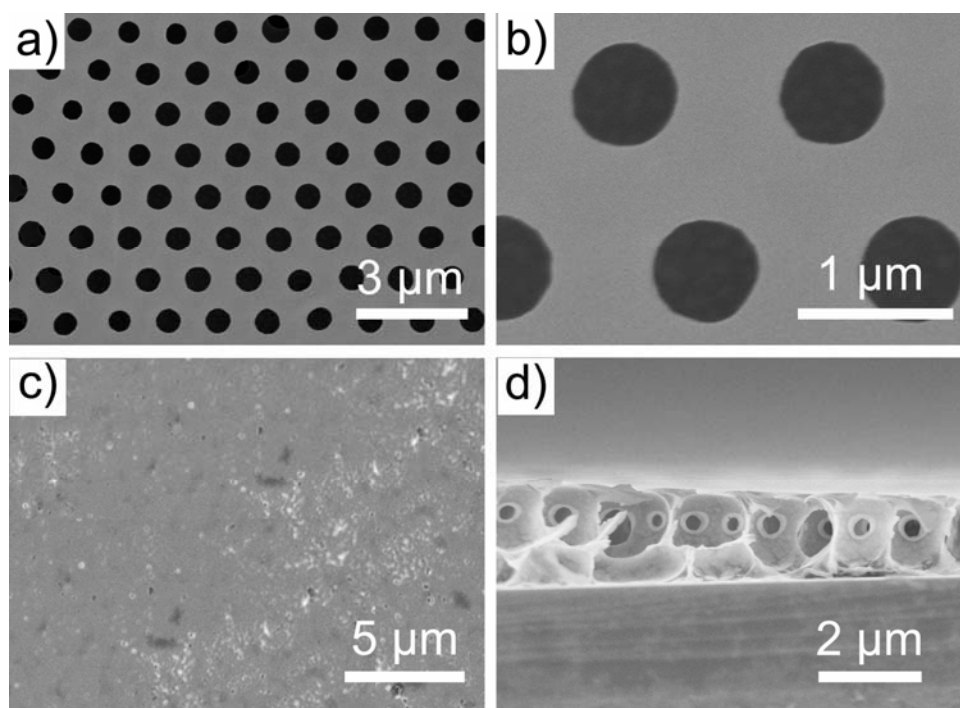

**Fig. S5** SEM images of the honeycomb film formed at solid surface: top view (a, b); bottom view (c); cross section (d).
